# Supplementary material
Source: Springer Nature journal article supplement (https://www.springermedizin.de/resource/supplementary/13058_2010_2751_MOESM2_ESM.pdf/9702078)

**Supplementary Figure 1. Scree plot of log-transformed Eigenvalues. Vertical dashed lines indicate three and five PCs taken to correct for population stratification within the Swedish and Finnish populations respectively.**

### Plot of log-transformed Eigenvalues

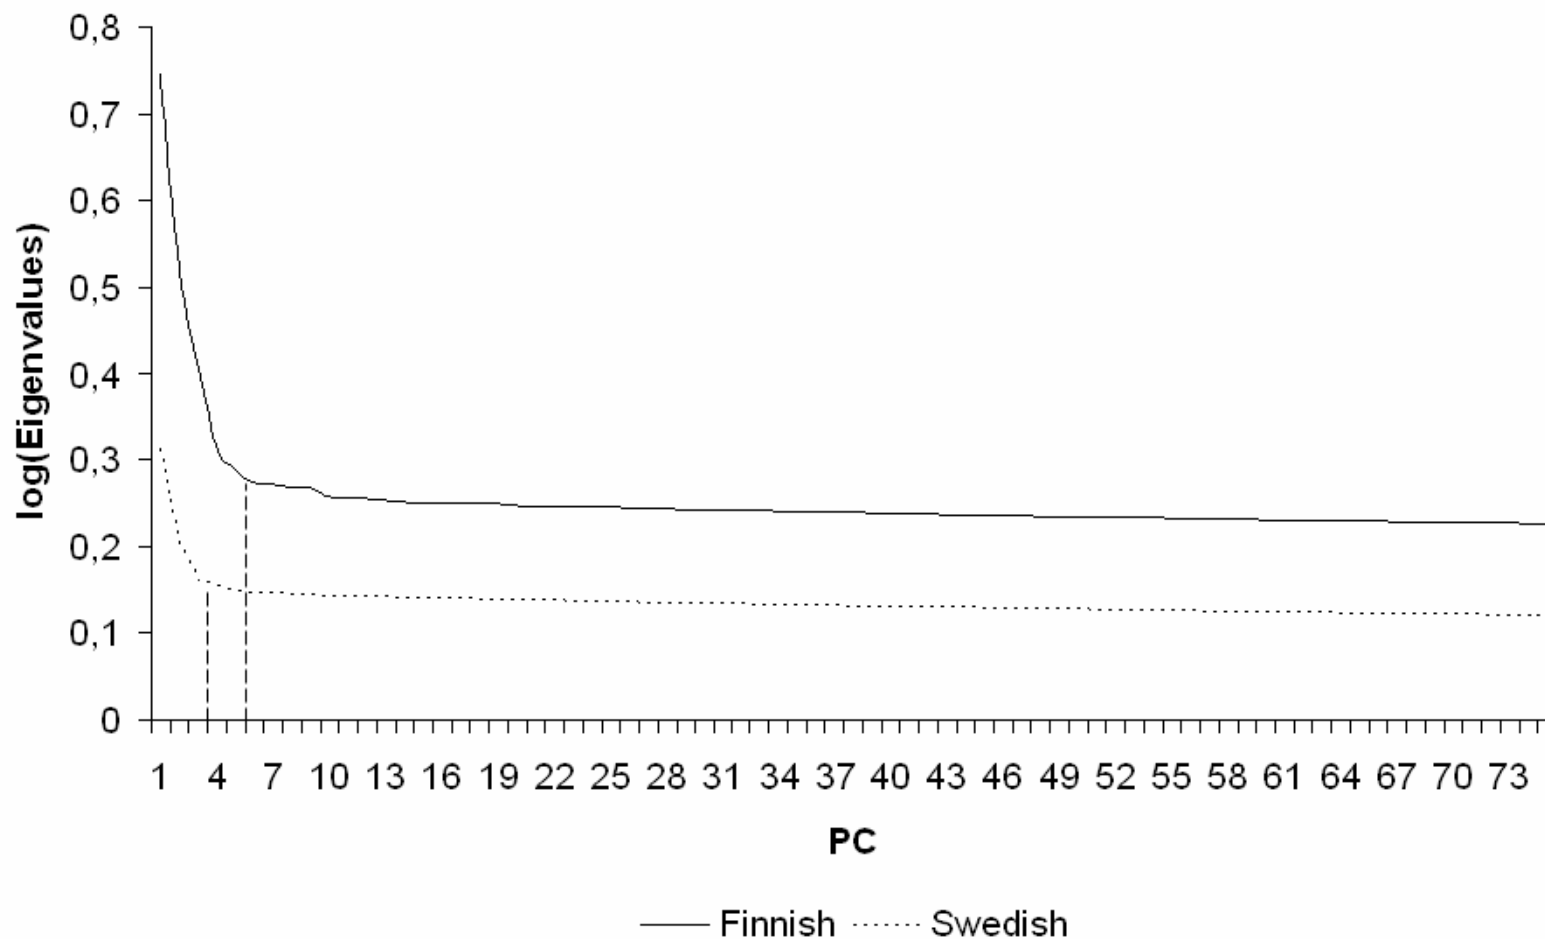

**Supplementary Figure 2. Quantile-quantile plot for 285,984 SNP trend tests, adjusted for population stratification using three principal components (Swedish subjects only). Genomic control inflation factor ( $\lambda$ ) = 1.0140.**

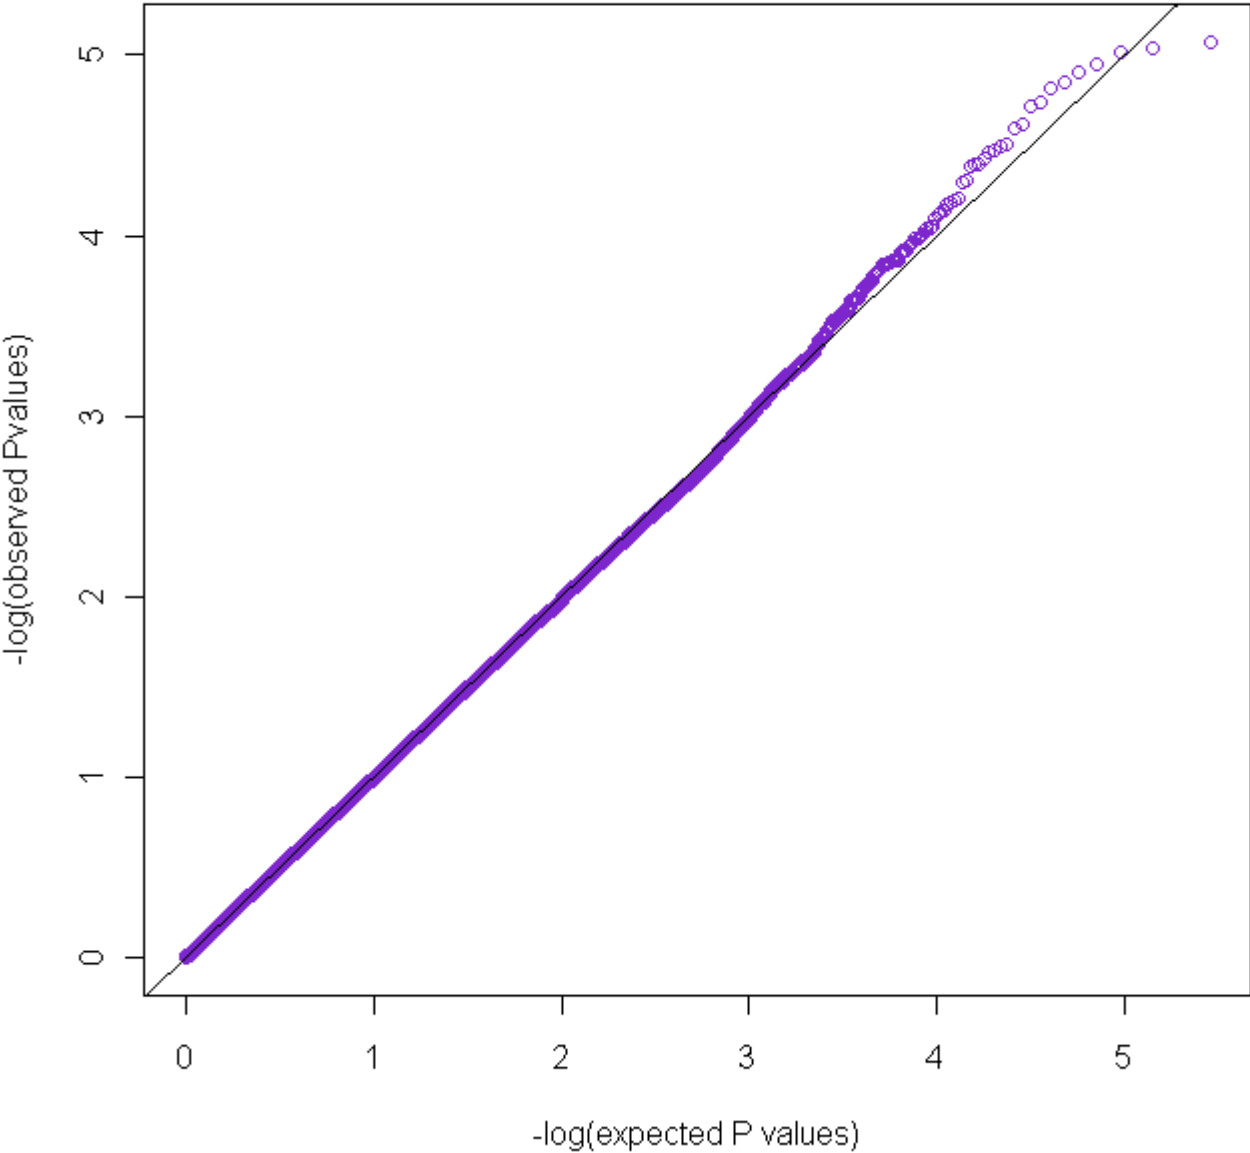

**Supplementary Figure 3. Quantile-quantile plot for 285,984 SNP trend tests, adjusted for population stratification using five principal components (Finnish subjects only). Genomic control inflation factor ( $\lambda$ ) = 1.0137.**

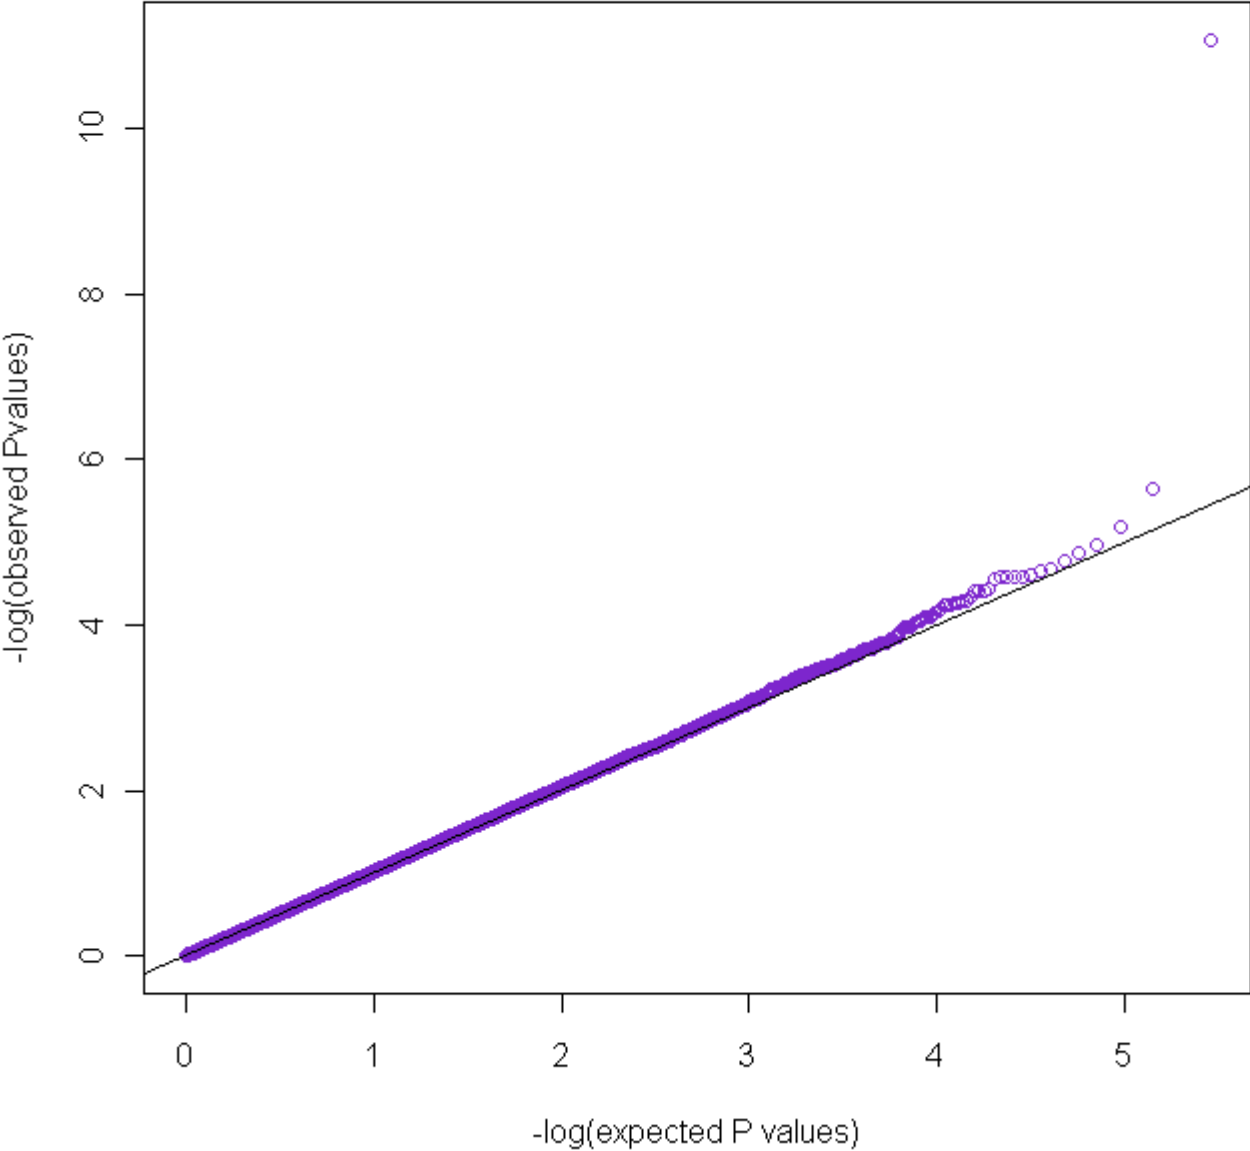

**Supplementary Figure 4. Quantile-quantile plot for 285,984 SNP trend tests, adjusted for population stratification (combined analysis of Swedish and Finnish subjects). Genomic control inflation factor ( $\lambda$ ) = 1.0218.**

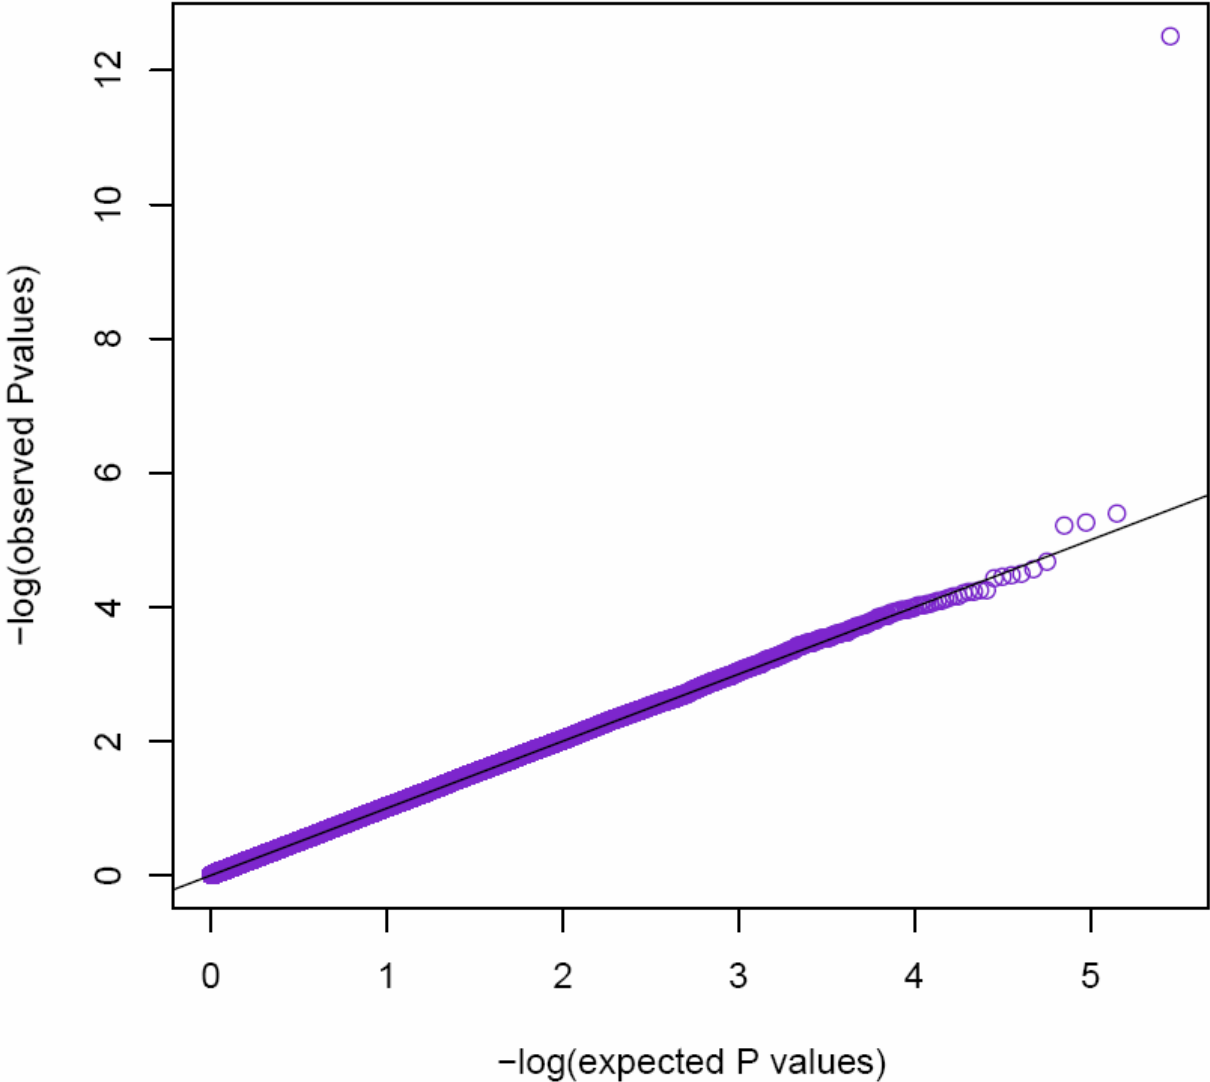

Supplement: MOESM2 [file 9702078]
